1 **Full title:** Caregivers' and nurses' perceptions of the Smart Discharges Program for children  
2 with sepsis in Uganda: A descriptive qualitative study

3 **Short title:** Perceptions of the Smart Discharges Program in Uganda

4 **Authors:** Justine Behan<sup>1\*</sup>, Olive Kabajaasi<sup>3\*</sup>, Brooklyn Derksen<sup>4</sup>, George Sendegye<sup>5</sup>, Brenda  
5 Kugumikiriza<sup>3</sup>, Clare Komugisha<sup>3</sup>, Radhika Sundararajan<sup>6</sup>, Shevin T. Jacob<sup>3, 7</sup>, Nathan Kenya-  
6 Mugisha<sup>3¶</sup>, Matthew O. Wiens<sup>1,2,3¶</sup>.

7

## 8 **Authors Affiliations**

9 <sup>1</sup>Institute for Global Health, BC Children's Hospital and BC Women's Hospital + Health Centre,  
10 Vancouver, Canada;

11 <sup>2</sup>Department of Anesthesiology, Pharmacology & Therapeutics, University of British Columbia,  
12 Vancouver, Canada

13 <sup>3\*</sup>Walimu, Kampala, Uganda

14 <sup>4</sup>College of Nursing, University of Saskatchewan, Saskatoon, Saskatchewan, Canada

15 <sup>5</sup>Mbarara University of Science and Technology, Mbarara, Uganda

16 <sup>6</sup> Department of Emergency Medicine, Weill Cornell Center for Global Health, Weill Cornell  
17 Medicine, New York, USA

18 <sup>7</sup> Department of Clinical Sciences, Liverpool School of Tropical Medicine, Liverpool, United  
19 Kingdom

20

21

22 <sup>¶</sup>Corresponding authors

23 Emails: [Matthew.Wiens@bcchr.ca](mailto:Matthew.Wiens@bcchr.ca) and [kenya@walimu.org](mailto:kenya@walimu.org)

24

25 \*These authors contributed equally to this work

26

27

28

29

30

31

## 32 **Abstract**

33           Sepsis arises when the body’s response to infection results in organ dysfunction. Among  
34 children hospitalized with suspected sepsis in low-income country settings, mortality rates  
35 following discharge are similar to mortality rates in hospital. The Smart Discharges Program  
36 uses a mobile health (mHealth) platform to identify children at high risk of post-discharge  
37 mortality to receive enhanced post-discharge care. This study sought to explore the perceptions  
38 of the caregivers and nurses of children enrolled into the Smart Discharges Program. We  
39 conducted a descriptive qualitative study that used a phenomenological approach. We conducted  
40 in-person focus group discussions (FGDs) with 30 caregivers of pediatric patients enrolled in the  
41 Smart Discharges Program and individual, semi-structured interviews with eight Smart  
42 Discharges Program nurses. The study was carried out at four hospitals in Uganda in 2019.  
43 Following thematic analysis, three key themes pertaining to the Smart Discharges program were  
44 identified: (1) Facilitators and barriers to follow-up care after discharge; (2) Changed behavior  
45 following discharge; and (3) Increased involvement of male caregivers. Facilitators included  
46 telephone/text message reminders, positive nurse-patient relationship, and the complementary  
47 aspects of the program. Resource constraints and negative experiences during post-discharge  
48 care seeking were reported as the most prominent barriers to post-discharge follow up. When  
49 provided with relevant and well-timed information, caregivers reported increased knowledge  
50 about post-discharge care and improvements in their ability to care for their child. Enrolment in  
51 the Smart Discharges Program also increased male caregiver involvement, which was reported as  
52 improved engagement in care, increased provision of resources and improved communication  
53 within the family and with the healthcare system. The Smart Discharges approach is an impactful

54 strategy to improve pediatric post-discharge care, and similar approaches should be considered to  
55 improve the hospital to home transition in similar low-income country settings.

## 56 **Introduction**

57 Sepsis arises when the body's response to an infection results in organ dysfunction (1). In  
58 2017, nearly 49 million incident cases of sepsis were reported globally with half occurring in  
59 children under five (2). The global sepsis burden is disproportionately carried by low- and  
60 middle-income countries (LMICs), with close to 3 million deaths annually among children under  
61 the age of five, most of which occur in sub-Saharan Africa (2).

62 Among children hospitalized with suspected sepsis in low-income country settings,  
63 mortality rates following hospital discharge are similar to those seen during the hospital phase of  
64 illness (3-8). Often referred to as post-sepsis syndrome, this period of high vulnerability  
65 following discharge is often unknown to many parents and healthcare workers who are also  
66 poorly equipped to facilitate a robust recovery within a community environment (9, 10). Recent  
67 data suggest that improved post-discharge outcomes can be achieved through educational  
68 interventions and community-level referrals for follow-up (11). Such interventions may form  
69 critical components necessary to improve the long-term survival of children with sepsis (12).  
70 However, despite their potential value, financial barriers faced by families and children, such as  
71 transportation costs, facility fees, and medications prescribed upon discharge, may make the  
72 implementation of such programs difficult (5, 13).

73 The Smart Discharges Program uses a mobile health (mHealth) platform to identify  
74 children at high risk of post-discharge mortality for enhanced post-discharge care. This  
75 innovative program provides an opportunity for front-line health workers in resource-poor  
76 environments to identify vulnerable children and to streamline a path for follow-up care during

77 the post-discharge period (14). Counselling and discharge planning target factors that are known  
78 or assumed to contribute to post-discharge mortality, including clinical, social, and system  
79 considerations. While all participants receive enhanced discharge counselling, high-risk children  
80 receive down-referrals to community health facilities for follow-up (12).

81 The Smart Discharge Program is currently being evaluated to determine its impact on  
82 post-discharge mortality among children admitted with suspected sepsis in Uganda (15).  
83 However, the perceptions and experiences of the parents/caregivers and nurses participating in  
84 this program have not yet been explored. The caregivers and nurses experiences are important to  
85 provide valuable insights applicable to program improvement. Therefore, we designed a  
86 qualitative study to explore the parents'/caregivers' and nurses' perceptions and experiences of  
87 the Smart Discharges Program and its effects on the post-discharge care of children who have  
88 been hospitalized with suspected sepsis.

## 89 **Methodology**

### 90 **Design**

91 We conducted a qualitative study using a descriptive phenomenological approach (16).  
92 This approach was well suited for our study because the goal is understanding the lived  
93 experiences of participants (17). Data were collected through in-person focus group discussions  
94 (FGDs) with caregivers of pediatric patients enrolled in the Smart Discharges Program and  
95 individual, semi-structured interviews with Smart Discharges Program nurses who had provided  
96 counselling to the caregivers during the child's admission. The study is reported using the  
97 Consolidated Criteria for Reporting Qualitative Research (COREQ) (Supplementary File S1)  
98 (18).

99

## 100 Study setting

101 The study was carried out at four hospitals in Uganda, including three public regional  
102 referral hospitals (RRHs) and one private-not for profit hospital (Table 1). Caregivers included in  
103 the study were from the surrounding areas, but their children received care and were enrolled in  
104 the Smart Discharges Program at these four facilities.

105 **Table 1: Annual Hospital Pediatric Admissions for 2019/2020**

| Study site                                | Estimated total bed capacity | Estimated Pediatric admission beds | Total annual pediatric admissions |
|-------------------------------------------|------------------------------|------------------------------------|-----------------------------------|
| Mbarara RRH                               | 494                          | 70                                 | 24,822                            |
| Jinja RRH                                 | 513                          | 50                                 | 22,167                            |
| Masaka RRH                                | 494                          | 45                                 | 24,574                            |
| Holy Innocents Children's Hospital (HICH) | 80                           | 80                                 | 3,986                             |

106 *Source:* Annual Health Sector Performance Report 2019-2020 (19).

## 107 Sample selection, recruitment, and consent

108 Participants were purposively selected for the caregiver FGDs with primary consideration  
109 given to ensuring balance between key post-discharge outcomes, including readmission, post-  
110 discharge mortality as well as adherence and non-adherence to prescribed post-discharge follow-  
111 up. Caregivers were eligible if their child had been enrolled into the Smart Discharges program  
112 and had been discharged at least two months prior to recruitment. Nurses were eligible to  
113 participate in the in-depth interview if they had worked in the Smart Discharges program for at  
114 least two months. FGD participants and nurses were invited to participate through telephone calls  
115 from the social scientist (OK), and FGDs and interviews were conducted in person in private  
116 rooms within the pediatric wards at the study sites. All participants provided written informed  
117 consent.

118

## 119 **Data collection**

120 FGDs and in-depth interviews were conducted between August 29, 2019 and October 30,  
121 2019. Three female and one male local research assistants (including co-authors GS, BK, CK)  
122 who were fluent in the languages (Runyankore, Luganda, and Lusoga) and had 2-4 years  
123 experience in moderating FGDs conducted the FGDs. They were trained and supervised by a  
124 female social scientist (OK; MA Sociology), with relevant working experience in conducting  
125 qualitative research in Ugandan health settings. Facilitators of the same sex as the participants  
126 moderated the FGDs in the local language. Individual interviews with nurses were conducted by  
127 OK in English. A focus group discussion guide (Supplementary File S2) and a semi-structured  
128 interview guide (Supplementary File S3) were used to provide structure and consistency to the  
129 discussion/interviews while allowing for novel concepts to be shared. The FGD guide focused on  
130 description of the experience at the admitting facility, experience after discharge, referral for  
131 follow-up, referral completion, referral facilities, and barriers to providing adequate care. Data  
132 collection was considered complete following four FGDs, based on the richness of data shared  
133 through feedback from the moderators, review of the transcripts, and notes. The in-depth  
134 interviews focused on the experience of providing caregiver education and counselling, and  
135 reporting of which programmatic components worked well and did not work well. Nurse  
136 interviewees were also asked about their observations of the benefits and challenges of the  
137 program to the caregivers. The FGD and interview guides were not pre-tested prior to use and no  
138 repeat interviews were done.

## 139 **Data analysis**

140 At the end of each FGD, field notes were written and shared with the study Principal  
141 Investigator to review and provide feedback to refine the guides for future use. FGDs and

142 interviews were audio recorded and transcribed directly in English by a professional translator  
143 and then OK reviewed for accuracy and consistency. Two investigators (JB and OK)  
144 independently created the initial coding framework, deductively using the FGDs/interview guide  
145 topics and inductively to identify emergent themes and subthemes. The coding framework was  
146 refined through discussion between JB, OK, and MOW. During analysis, data was organized  
147 using NVivo version 12.0 (QSR, Massachusetts, United States). After development of the coding  
148 framework and initial coding, themes were proposed, and discussed between JB, OK, and MOW  
149 who jointly agreed on the study themes and then confirmed full team agreement on the final  
150 themes.

## 151 **Trustworthiness**

152 Trustworthiness and phenomenological validity were achieved through credibility,  
153 reflexivity, dependability, conformability, and transferability (17, 20). Themes and sub-themes  
154 were triangulated against the field notes of the research assistant who completed the FGDs to  
155 ensure credibility of findings during the analytical process. Transcripts were not returned to  
156 participants for review and correction. To ensure reflexivity, two researchers (JB and OK)  
157 analyzed the data and discussed their findings to produce the coding framework. They discussed  
158 potential biases, questions, and concerns, allowing for a sharing of perspectives (21). The  
159 research team ensured dependability and confirmability by writing detailed notes and conducting  
160 regular discussions to review progress, the research process, and study findings. To improve the  
161 transferability and relevance of the results, we provided contextual information about the study  
162 setting, sample characteristics, and interview guides.

163

164

## 165 Ethical consideration

166 The Makerere University School of Public Health, Research and Ethics Committee (SPH-  
167 REC # 691) and the Uganda National Council for Science and Technology (UNCST SS #5047)  
168 provided ethics approval for this study. Participant confidentiality was emphasized during the  
169 consent process, and compensation of 25,000 Ugandan Shillings (approximately 7 USD) was  
170 given to each participant.

## 171 Results

172 A total of 40 participants were invited to take part in the study; of these, 38 participated,  
173 and two caregivers declined citing lack of transport and time (see Table 2a and 2b: Participant  
174 Demographics). Four FGDs were conducted, consisting of one with fathers and three with  
175 mothers or other female caretakers. Eight interviews with nurses were completed, two from each  
176 participating facility. Each FGD consisted of 7-8 participants and lasted between 90 and 120  
177 minutes, while individual interviews lasted between 45 and 60 minutes.

178 **Table 2a: Nurse Participant Demographics (Individual Interviews)**

| Characteristics               | Value                                                    |
|-------------------------------|----------------------------------------------------------|
| # of Nurse Participants       | 8                                                        |
| Gender (M/F)                  | 1/7                                                      |
| Age Range (Y)                 | 21-33                                                    |
| Hospital (# of nurses)        | Mbarara RRH (2); Jinja RRH (2); Masaka RRH (2); HICH (2) |
| Education Level (# of nurses) | Diploma (4); Certificate (4)                             |

179  
180 **Table 2b: Caregiver Participant Demographics (FGDs)**

|                                | # of Participants | Age Range (Years) |
|--------------------------------|-------------------|-------------------|
| <b>Female Caregiver FGD #1</b> | 8                 | 22-45             |
| <b>Female Caregiver FGD #2</b> | 7                 | 28-37             |
| <b>Female Caregiver FGD #3</b> | 8                 | 21-48             |
| <b>Male Caregiver FGD</b>      | 7                 | 22-57             |
| <b>TOTAL</b>                   | 30                | 21-57             |

181



182 Twenty-seven of the caregivers were parents of the children enrolled in the Smart  
183 Discharges Program, and three were other family members (one grandmother and two aunts).  
184 Out of the 30 caregivers, reported completing all three follow up appointments, four had children  
185 that were readmitted to hospital after their initial discharge, and one had a child that died  
186 following discharge.

## 187 **Thematic analysis**

188 Following thematic analysis, three key themes were identified: (1) Facilitators and  
189 barriers to follow-up care after discharge; (2) Changed behavior following discharge; and  
190 (3) Increased involvement of male caregivers. Within each key theme, multiple subthemes were  
191 identified and are summarized in Table 3.

192 **Table 3: Coding Framework**

| Key Theme                                                      | Sub-theme                                                                                                                                                                                            |
|----------------------------------------------------------------|------------------------------------------------------------------------------------------------------------------------------------------------------------------------------------------------------|
| 1. Facilitators and barriers to follow up care after discharge | Facilitators <ul style="list-style-type: none"><li>• Telephone/SMS reminders</li><li>• Positive nurse-patient relationship</li><li>• Complementary aspects of the Smart Discharges program</li></ul> |
|                                                                | Barriers <ul style="list-style-type: none"><li>• Lack of resources</li><li>• Discharge against medical advice</li><li>• Experiences with untrained/unfriendly healthcare workers</li></ul>           |
| 2. Changed behavior following discharge                        | Relevancy and timing of counselling/education                                                                                                                                                        |
|                                                                | Increased caregiver knowledge                                                                                                                                                                        |
| 3. Increased involvement of male caregivers                    | Engagement in care                                                                                                                                                                                   |
|                                                                | Provision of resources                                                                                                                                                                               |
|                                                                | Communication                                                                                                                                                                                        |

193

194

195

## 196 **Facilitators and barriers to follow-up care after discharge**

### 197 **Facilitators to follow-up care after discharge**

198 The three main facilitators to follow-up care after discharge were telephone/short  
199 message service (SMS) text reminders, a positive nurse-caregiver/patient relationship, and the  
200 complementary aspects of the Smart Discharges Program. Follow up care following discharge  
201 was defined as the adherence to discharge care instructions and attendance at post-discharge  
202 follow up visits.

203 The caregivers were appreciative of and motivated by SMS referral reminders and  
204 follow-up phone calls after their discharge. These SMS messages served as a reminder for and  
205 provided encouragement to attend the post-discharge follow up at community level facilities.

206 *“I finished all the visits because the organization kept on reminding me [via SMS] to take*  
207 *the child to hospital for checkup. This organization of Smart Discharge, they could call*  
208 *me every Tuesday reminding me. [This is] something that encouraged me so I finished all*  
209 *the routines of taking the child to the hospital for checkup”* (Caregiver24).

210 Nurses reported having more success providing discharge education with caregivers  
211 when they had built a positive nursing relationship with the patient and caregiver.

212 *“Because it begins with trying to create rapport...and much as the children have come*  
213 *with different infections, when you create that professional relationship they open up...*  
214 *They open up easily and the work becomes easier”* (Nurse3).

215 Additionally, having a strong nurse-caregiver relationship helped to support better care-seeking  
216 behavior after discharge. One nurse shared,

217           *“Even after going home, the caregivers keep calling us and telling us how their children*  
218           *are doing and the health centers they have visited. The caregivers now have a positive*  
219           *attitude towards healthcare-seeking than before”* (Nurse1).

220 Caregivers who were a part of Smart Discharges reported feeling valued and cared for both  
221 during the discharge phase of hospitalization as well as after discharge.

222           Each component of the program, including risk assessment, educational materials,  
223 counselling, and post-discharge referral, were described as complementary, and that they  
224 *“...work hand in hand”* (Nurse7). A nurse explained, *“[the Smart Discharges Program*  
225 *components] are all complementing each other...they are all supporting one another and none of*  
226 *them can work in isolation”* (Nurse4).

## 227 **Barriers to follow up care after discharge**

228           The key barriers to follow-up care were lack of resources, discharges against medical  
229 advice, and experiences with untrained/unfriendly healthcare workers. Lack of resources, which  
230 included inadequate financial resources, transportation challenges, and lack of family support,  
231 was a prominent barrier to follow-up care. Caregivers’ financial constraints came up frequently  
232 and affected follow up visit attendance, adequate nutritional support of recovering children, and  
233 purchasing of necessary medication and supplies. One nurse shared,

234           *“The high risk patients...When we tell them to go to the nearest health centres some of*  
235           *them are not sure they will have money to do all the three visits...Sometimes they don’t*  
236           *mention this at discharge, but after they have gone home and when we call them they say*  
237           *they did not go for follow up because they did not have money”* (Nurse7).

238 A caregiver explains this further, *“That day reaches when we don’t even have the money for*  
239 *transport. Even the husband fails to provide money, so you say ‘I will not go that day’”*

240 (Caregiver10). The nurses highlighted the need to balance the financial demands of having a sick  
241 child when there are other children to support at home. It was emphasized that caregivers were  
242 doing the best they could with the resources that they have. As another nurse described, “...*the*  
243 *issue of poverty is also a big problem. The caregivers are seemingly appreciating the*  
244 *information being given, but them practicing what is being preached to them is a challenge*”  
245 (Nurse1).

246 Financial constraints also contributed to patients and caregivers being discharged against  
247 medical advice. When patients and family leave before it is medically advisable to do so, they  
248 miss the opportunity to receive adequate discharge counselling or to receive their follow up  
249 appointments. A nurse explained,

250 “*There is a financial challenge...For example, some mothers are admitted when they*  
251 *don’t have money to buy food and sometimes they have to buy the drugs as well. So, some*  
252 *will be willing to stay in hospital, but they are worried of what the child will eat. They*  
253 *also see no reason of staying in hospital because they don’t have money to buy the*  
254 *prescribed medicine. So even though we take time to convince the mother to stay, she will*  
255 *eventually go*” (Nurse8).

256 Negative encounters with healthcare workers at the community health facilities was a  
257 barrier identified by nurses as well as caregivers who had attended follow up appointments.  
258 These encounters were reported to be negative because not all healthcare workers had received  
259 training on the “downward referral” process and, therefore, did not know the process for  
260 assessing the children. As a result, healthcare workers were often unfriendly towards patients and  
261 caregivers who were reporting for a follow-up assessment. A nurse explained, “*There is a*  
262 *challenge of caregivers who take their children to nearby referral health centres. They face*

263 *backlashes from health workers there who bash them for taking children to health facilities when*  
264 *they are not sick” (Nurse1). This was also validated by the caregivers’ perspectives, “When they*  
265 *were discharging us they told us to take our child to the nearest hospital every week, but when I*  
266 *went there, they shouted at me asking me why am bringing my child to the hospital yet he is not*  
267 *sick” (Caregiver23). When caregivers had an initial negative experience at a community health*  
268 *facility when seeking follow up care, this often impacted future care seeking and the desire to*  
269 *attend subsequent visits.*

## 270 **Changed behavior following discharge**

271 The perceptions of both caregivers and nurses demonstrated that the discharge education  
272 provided often resulted in changed behavior. Participants noted that appreciating the relevancy  
273 and the timing of the counselling was important. When information was relevant and well timed,  
274 caregivers’ knowledge about post-discharge care of their children increased, which facilitated  
275 behavior changes once they left the hospital.

## 276 **Relevancy and timing of counselling/education**

277 Receptivity of caregivers to discharge education was improved by its perceived relevance  
278 and the caregiver’s ability to engage with the materials. As a caregiver explained, “*The*  
279 *education and counseling was useful to me because I got to learn how to take care of a child;*  
280 *how to prepare her meals, hygiene, sleeping under a mosquito net” (Caregiver2). The education*  
281 *was directly related with how to care for their vulnerable child and relevant to returning home*  
282 *after discharge.*

283 “*What we do is that we let them know that a time will come and they will be discharged*  
284 *from hospital and what they need to hold as key is that a patient discharged from hospital*  
285 *is not necessarily completely healed but still on the road to recovery” (Nurse3).*

286 The importance of caregivers receiving education and understanding how it applies to improving  
287 outcomes for their children was validated, *“At least if each health worker would talk to a mother  
288 and disseminate information regarding the condition of the baby and how to go about it, I am  
289 sure this can reduce on the mortalities in their homes”* (Nurse 6). Another key element to  
290 receptivity was caregiver engagement with the educational materials and how the educational  
291 messages were conveyed. For example,

292 *“The [caregivers] are interested in [the educational materials] because it has pictorial  
293 illustrations...which caregivers gleefully find illustrative of what they are required to do.  
294 For instance, going to hospital, what to feed on, the need for the husband to escort the  
295 wife to hospital. At least that one they find it exciting”* (Nurse5).

296 The timing of education was also found to be important. As a nurse explained,

297 *“They don’t know if the child is even getting better, so they tend to be nervous. So, what I  
298 do is to find the convenient time when the patient is a bit stable. When there are not many  
299 attendants around them, when they are not on phone communicating with their people  
300 back home. When they are calm and stable. So, I approach them and talk to them about  
301 malaria, what brings about malaria, how it can be prevented at home, and this differs  
302 from one child to another depending on how it is presented”* (Nurse3).

303 By ensuring the caregiver is both physically and mentally in a space where they can learn, they  
304 are more able to retain the information.

### 305 **Increased caregiver knowledge**

306 The majority of caregivers shared that at least portions of the education they received  
307 from Smart Discharges Program was new information to them. Nurses reported caregivers  
308 learning about how to identify danger signs and the critical timing to seek care for their children.

309 *“Caregivers are at home but they don’t know about these danger signs. When we talk to*  
310 *them about these, they appreciate and promise to always take their children to nearby*  
311 *health centres as soon as these danger signs manifest so as to get first aid” (Nurse7).*

312 One father explained a behavior change he observed in his wife,

313 *“It wasn’t me they found in the hospital. It was my wife and she learnt many things*  
314 *because I saw her changing. She used not to respond quickly in case of any illness but*  
315 *now she rushes to the hospital at a time she sees a sign of illness” (Caregiver29).*

316 Many nurses and caregivers spoke about how nutritional education was applied following  
317 discharge.

318 *“There are some mothers who come with children in hospital. The child is one-year-old*  
319 *but he/she is only feeding on breast milk... there is now some change. Some have been*  
320 *coming here... in our follow up unit... And you find that the child has completely changed*  
321 *in terms of weight addition and generally they look healthy. We attribute this to the*  
322 *information we give them. Because we have been emphasizing to them that the child*  
323 *needs to be introduced to other feeds at 6 months of age, so we feel they have embraced*  
324 *this message. We have also reduced post-discharge mortality and reinfection because of*  
325 *our continued teachings about feeding children on a balanced diet which improves their*  
326 *immune systems to fight against infections” (Nurse1).*

327 Caregivers also explained that the same principles that were learned through Smart Discharges  
328 were applied to the families’ other children. Examples included, feeding all of their children  
329 nutritious food and improved care-seeking behaviours when any child in the family fell sick.

330 A male caregiver shared his experience,

331           *“All the things about nutrition, am applying them to my other children and they look*  
332           *healthy. For example, I have chicken, I have fruits like paw-paws [papaya], now I give*  
333           *them, I used to sell all of them and use money to drink. Now I repented”* (Caregiver25).

## 334 **Increased involvement of male caregivers**

335           The programs impact on male involvement in their child’s care was seen most  
336 prominently through changes in the father’s engagement in care, provision of resources for care,  
337 and in changes in health-related communication both within the family and with the healthcare  
338 system.

## 339 **Engagement in care**

340           Nurses saw benefits when education/counselling was done with the child’s father present.  
341           *“Some mothers are worried that although they are bound to stay in hospital, it is the*  
342           *husband who should have the final say on this. So in such a situation what I do, I go and*  
343           *give health education to the mother in the presence of the husband and during the session*  
344           *I emphasize the importance of staying in hospital and the husband’s responsibility. I*  
345           *encourage the husband to financially support the mother for the duration of her stay in*  
346           *hospital and in the end both parties agree to stay in hospital”* (Nurse8).

347           This example highlights how the Smart Discharges education increased male caregivers’  
348 engagement at the facility level. Several caregivers shared examples of how their husbands’  
349 engagement in their children’s care also increased at home.

350           *“My husband used not to even give us transport to the hospital when I used to ask him for*  
351           *transport...but since I joined this organization my husband is active. We always come*  
352           *with him to the hospital. He buys food and other responsibilities”* (Caregiver19).



353 Furthermore, receiving discharge education has given fathers a means to improve their  
354 relationships with their children. *“It has helped me in increasing my relationship with my child,  
355 because what I read on the card. I buy for her some food like an egg. She becomes so happy”*  
356 (Caregiver29).

### 357 **Provision of resources**

358 When the patient’s father received the Smart Discharges education, an increased  
359 understanding of the needs of the child and the primary caregiver was seen. This awareness in  
360 turn resulted in increased provision of resources for the child and primary caregivers. One  
361 caregiver explained,

362 *“At the time of discharge, it was not me with the child, it was my husband that was there*  
363 *with the child. He learnt how to care for the child. Since then, when I tell him that I want*  
364 *this for the child, he immediately gives it to me because he does not want to go back to*  
365 *the situation that we were in of spending money in the hospital. Every time I tell him that*  
366 *at least the child has to eat eggs twice a week. He makes sure that he buys the eggs”*  
367 (Caregiver21).

368 Other caregivers shared similar sentiments and acknowledged that after their husbands received  
369 discharge education, they bought foods to follow nutritional guidance and purchased the  
370 medications prescribed to their children. Male caregivers were more open to providing  
371 transportation support for their children to attend follow up appointments or to return to the  
372 hospital when the child was sick again. One male caregiver explained, *“When I reached home I*  
373 *made sure that I buy everything he needs [and] take him to the hospital for checkups until he*  
374 *totally healed”* (Caregiver27).

375

## 376 **Communication**

377           Participation in the program fostered discussions between fathers and mothers about their  
378 child’s wellbeing and how to support their vulnerable child. Often the father’s cell phone number  
379 was provided to receive follow-up reminders, invoking the father to play an important role in  
380 communication with the mother.

381           *“Smart Discharge has helped me, in getting involved in the care of my child because  
382 whenever I get a call from Smart Discharge, I go and tell my wife that we have to go back  
383 to the hospital so that we can learn on how to take care of our child. Therefore, this  
384 increases on my relationship with my wife and the child”* (Caregiver28).

385           Additionally, improved communication between the healthcare system and male caregivers  
386 helped them to better understand why their child was hospitalized and to follow discharge  
387 instructions.

388           *“They are different because previously, they used to just pack for us pills without  
389 explaining so much on what you should do. But when we joined Smart Discharge, things  
390 changed because before discharging us they first talk to us”* (Caregiver26).

## 391 **Discussion**

392           The results of this study improve our understanding of the caregiver and nurse  
393 perceptions of a child-centered approach to peri-discharge care, as reflected in the Smart  
394 Discharges Program. With the aim of improving outcomes during the vulnerable post-discharge  
395 period, this qualitative study found that this program facilitates follow-up, home-based care  
396 practices as well as the involvement of male caregivers. Resource constraints and negative  
397 experiences when seeking follow-up care were the most prominent barriers to completing

398 recommended post-discharge follow up and, thus, represents an area of opportunity to further  
399 improve adherence to post-discharge care.

400         Though the common paradigm of “if sick, seek care” can work well when caregivers can  
401 accurately determine when to seek care, during the post-discharge period children may  
402 deteriorate quickly, and early signs of such deterioration may be subtle and difficult for parents  
403 to identify (22). Caregivers may not recognize overt danger signs of severe illness (23). This lack  
404 of recognition is disproportionately the case among the socio-economically disadvantaged who  
405 may face additional barriers to effective care seeking (24). Our results clearly demonstrate the  
406 positive impact of our discharge education program on caretakers’ perceived knowledge and  
407 confidence in providing care to their child during the post-discharge period. As such, the  
408 transition of care from facility-based care to home-based care by the children’s caregiver may be  
409 more effective if caregivers have the necessary education to easily recognize danger signs and  
410 not to delay seeking care when they are present (23). Our results also highlight the importance of  
411 caregiver engagement for effective knowledge transfer. This information exchange was largely  
412 achieved through consistent, clear, and easy to understand materials (25).

413         Participants reported the extension of benefits to other family members and to the broader  
414 community. Both female and male caregivers who participated in this study reported applying  
415 the Smart Discharges principles to their other children and sharing them within their  
416 communities. Many participants commented on the economic implications and cost savings  
417 when they were able to prevent infections/sepsis and the subsequent hospitalizations/medical  
418 care for the whole family. Future work should address how we can strengthen educational  
419 engagement concerning the care of clinically vulnerable children at the community level, such as  
420 through schools, churches, and other community groups.

421           Within the formal health system, receptivity to routine follow-up of discharged children  
422 is critically important to effective long-term management of sepsis and was a noted barrier to  
423 post-discharge care. Education for health workers at local health facilities on post-sepsis  
424 syndrome may resolve the confusion that healthcare workers face when a seemingly well child  
425 comes for follow-up. Healthcare workers will understand that the primary purpose of the post-  
426 discharge follow-up visit is to determine if the child is continuing to make a robust recovery or  
427 whether any signs or symptoms are present that warrant further care or investigation. It is critical  
428 that the paradigm of sepsis care shifts from a primary focus on acute care to a more holistic focus  
429 that does not neglect the critical period of vulnerability following hospital discharge, which has  
430 been largely neglected in both policy and practice (5, 24).

431           When children's male caregivers were included in the Smart Discharges Program, it  
432 fostered their involvement in their child's care. Often, the phone number used for SMS follow-up  
433 was that of the father. This arrangement automatically created engagement with the fathers that  
434 otherwise may not have existed. Engagement in care was reflected in an increased interest in the  
435 post-discharge care process as well as increased provision for essentials of care, such as food and  
436 transportation. Gopal, *et al.*, highlight that there is a positive association between male  
437 involvement and better maternal and child health outcomes in Uganda (26). They suggest  
438 involving male community members, specifically fathers and community leaders who are  
439 attuned to the context, to improve the approach to how males are involved in care and to help  
440 support sustainable behavior change (26).

441           Financial constraints were frequently reported as a key barrier to care following  
442 discharge, especially with regards to transportation. Many caregivers who participated in this  
443 study shared that if they do not have the money necessary for transport, that they will not be able

444 to attend follow up appointments. Financial constraints have been identified as a barrier to follow  
445 up care in other health contexts (23) and has prompted a call for further interventions to target  
446 patients facing transportation challenges (27). For caregivers with constrained resources, a more  
447 cost-effective alternative to improving post-discharge care could have a substantial impact.  
448 When a physical, in-person follow-up is not possible, remote patient assessment via phone or  
449 other communication technologies could serve as a viable alternative (28, 29). The COVID-19  
450 pandemic resulted in the expanded use of telemedicine and other technologies to deliver  
451 healthcare services in Uganda (30). Such experiences should be leveraged so that healthcare  
452 workers and patients/caregiver can further optimize the efficiency and quality of post-discharge  
453 care (23). The use of community health workers is widespread in many regions of sub-Saharan  
454 Africa, but their work is often not well linked to the broader health system with respect to  
455 information transfer. Improved digital linkages between community health workers and their  
456 referral facilities could substantially improve the provision of post-discharge care through  
457 discharge notifications being sent directly to community health workers (31, 32).

## 458 **Limitations**

459 This study is subject to several limitations. First, only children under the age of five were  
460 enrolled in the Smart Discharges Program. As such, children themselves did not contribute their  
461 perceptions of the program. It is probable that children may have been able to offer a valuable  
462 perspective on the Smart Discharges Program, though this may be more pronounced if older  
463 children were enrolled into the parent study. Second, the findings of this study were specifically  
464 focused on an intervention within the context of a research evaluation. As such, implementation  
465 science studies are needed to facilitate integration of this type of program into routine care.

466 Finally, this study was conducted in a single county and further qualitative work is needed to  
467 understand how this approach may be generalizable to other regions.

## 468 **Conclusions**

469 The Smart Discharges Program is a digitally assisted health innovation that facilitates  
470 discharge follow-up, home-based care practices, and the involvement of male caregivers.  
471 Opportunities to improve pediatric discharge care include developing interventions to address  
472 caregivers' resource constraints and negative experiences when seeking follow-up care. The  
473 Smart Discharges approach is an impactful strategy to improve pediatric post-discharge care, and  
474 similar approaches should be considered to improve the hospital to home transition in other low-  
475 resource settings.

## 476 **Acknowledgements**

477 We would like to acknowledge the WALIMU team, staff at the participating hospitals,  
478 and patients and caregivers for their participation.

## 479 **Funding**

480 MOW and NKM received funding (#TTS-1809-1939) for this study from Grand  
481 Challenges Canada (GCC). The views expressed are those of the authors and not necessarily  
482 those of GCC. The funders had no role in study design, data collection and analysis, decision to  
483 publish or preparation of the manuscript.

## 484 **Competing Interests**

485 No competing interests declared.

486

487

## 488 **Author Contributions**

489           This study was conceptualized and designed by MOW in conjunction with NKM, STJ,  
490 RS, and OK. MOW and NKM acquired funding for the project. GS, BK, CK, and OK completed  
491 data collection and synthesis. OK and JB led the data analysis and interpretation, with initial  
492 support from BD and RS. JB led principal drafting of the manuscript, with contributions from  
493 OK and support from MOW. All authors critically reviewed and approved the final manuscript.

## 494 **References**

- 495 1. Singer M, Deutschman CS, Seymour CW, Shankar-Hari M, Annane D, Bauer M, et al. The  
496 Third International Consensus Definitions for Sepsis and Septic Shock (Sepsis-3). *JAMA*.  
497 2016;315(8):801-10.
- 498 2. Rudd KE, Johnson SC, Agesa KM, Shackelford KA, Tsoi D, Kievlan DR, et al. Global,  
499 regional, and national sepsis incidence and mortality, 1990-2017: analysis for the Global Burden  
500 of Disease Study. *The Lancet*. 2020;395(10219):200-11.
- 501 3. Akech S, Kwambai T, Wiens MO, Chandna A, Berkley JA, Snow RW. Tackling post-  
502 discharge mortality in children living in LMICs to reduce child deaths. *The Lancet Child &*  
503 *Adolescent Health*. 2023;7(3):149-51.
- 504 4. Chaudhry M, Knappett M, Nguyen V, Trawin J, Mugisha NK, Kabakyenga J, et al. Pediatric  
505 post-discharge mortality in resource-poor countries: A protocol for an updated systematic review  
506 and meta-analysis. *PloS one*. 2023;18(2):e0281732.
- 507 5. Nemetchek B, English L, Kissoon N, Ansermino JM, Moschovis PP, Kabakyenga J, et al.  
508 Paediatric postdischarge mortality in developing countries: a systematic review. *BMJ Open*.  
509 2018;8(12):e023445.
- 510 6. Njunge J, Tickell K, Diallo A, Sayeem Bin Shahid A, Gazi M, Saleem A, et al. The Childhood  
511 Acute Illness and Nutrition (CHAIN) network nested case-cohort study protocol: a multi-omics  
512 approach to understanding mortality among children in sub-Saharan Africa and South Asia  
513 [version 2; peer review: 2 approved]. *Gates Open Research*. 2022;6(77).
- 514 7. Wiens MO, Bone JN, Kumbakumba E, Businge S, Tagoola A, Sherine SO, et al. Mortality  
515 after hospital discharge among children younger than 5 years admitted with suspected sepsis in



- 516 Uganda: a prospective, multisite, observational cohort study. *The Lancet Child & Adolescent*  
517 *Health*. 2023.
- 518 8. Wiens MO, Pawluk S, Kissoon N, Kumbakumba E, Ansermino JM, Singer J, et al. Pediatric  
519 post-discharge mortality in resource poor countries: a systematic review. *PloS one*.  
520 2013;8(6):e66698.
- 521 9. Ranjeva SL, Warf BC, Schiff SJ. Economic burden of neonatal sepsis in sub-Saharan Africa.  
522 *BMJ Global Health*. 2018;3(1):e000347.
- 523 10. Wiens MO, Kumbakumba E, Kissoon N, Ansermino JM, Ndamira A, Larson CP. Pediatric  
524 sepsis in the developing world: challenges in defining sepsis and issues in post-discharge  
525 mortality. *Clinical epidemiology*. 2012;4:319-25.
- 526 11. Fleischmann-Struzek C, Goldfarb DM, Schlattmann P, Schlapbach LJ, Reinhart K, Kissoon  
527 N. The global burden of paediatric and neonatal sepsis: a systematic review. *The Lancet*  
528 *Respiratory Medicine*. 2018;6(3):223-30.
- 529 12. Wiens MO, Kumbakumba E, Larson CP, Moschovis PP, Barigye C, Kabakyenga J, et al.  
530 Scheduled Follow-Up Referrals and Simple Prevention Kits Including Counseling to Improve  
531 Post-Discharge Outcomes Among Children in Uganda: A Proof-of-Concept Study. *Global*  
532 *Health: Science and Practice*. 2016;4(3):422-34.
- 533 13. Krepiakevich A, Khowaja A, Kabajaasi O, Nemetchek B, Ansermino JM, Kissoon N, et al.  
534 Out of pocket costs and time/productivity losses for pediatric sepsis in Uganda: a mixed-methods  
535 study. *BMC Health Services Research*. 2021;21(1):1-9.
- 536 14. Wiens MO, Kumbakumba E, Larson CP, Ansermino JM, Singer J, Kissoon N, et al.  
537 Postdischarge mortality in children with acute infectious diseases: derivation of postdischarge  
538 mortality prediction models. *BMJ Open*. 2015;5(11):e009449.

- 539 15. ClinicalTrials.gov [Internet]. Bethesda (MD): National Library of Medicine  
540 (US). 2023 Feb 15. Identifier NCT05730452, Smart Discharges to Improve Post-discharge  
541 Health Outcomes in Children; 2023 Feb 15 [cited 2023 May 2]. Available from:  
542 [https://clinicaltrials.gov/ct2/show/NCT05730452?term=post-](https://clinicaltrials.gov/ct2/show/NCT05730452?term=post-discharge+mortality&draw=2&rank=2)  
543 [discharge+mortality&draw=2&rank=2](https://clinicaltrials.gov/ct2/show/NCT05730452?term=post-discharge+mortality&draw=2&rank=2)
- 544 16. van Manen M, Higgins I, van der Riet P. A conversation with Max van Manen on  
545 phenomenology in its original sense. *Nursing & Health Sciences*. 2016;18(1):4-7.
- 546 17. Sundler AJ, Lindberg E, Nilsson C, Palmér L. Qualitative thematic analysis based on  
547 descriptive phenomenology. *Nursing Open*. 2019;6(3):733-9.
- 548 18. Tong A, Sainsbury P, Craig J. Consolidated criteria for reporting qualitative research  
549 (COREQ): a 32-item checklist for interviews and focus groups. *International Journal for Quality*  
550 *in Health Care*. 2007;19(6):349-57.
- 551 19. Ministry of Health Uganda. Annual Health Sector Performance Report 2019-2020. *Available*  
552 *from URL* <http://www.health.go.ug/mohreports.htm>. Published online 2020:222.  
553 [http://library.health.go.ug/publications/performance-management/annual-health-sector-](http://library.health.go.ug/publications/performance-management/annual-health-sector-performance-report-financial-year-201920)  
554 [performance-report-financial-year-201920](http://library.health.go.ug/publications/performance-management/annual-health-sector-performance-report-financial-year-201920).
- 555 20. Korstjens I, Moser A. Series: Practical guidance to qualitative research. Part 4:  
556 Trustworthiness and publishing. *European Journal of General Practice*. 2018;24(1):120-4.
- 557 21. Cohen D. Qualitative research guidelines project. 2006. *Available from*  
558 <http://www.qualres.org/>
- 559 22. English L, Kumbakumba E, Larson CP, Kabakyenga J, Singer J, Kissoon N, et al. Pediatric  
560 out-of-hospital deaths following hospital discharge: a mixed-methods study. *African health*  
561 *sciences*. 2016;16(4):883-91.

- 562 23. Ranjit S, Kissoon N. Challenges and Solutions in translating sepsis guidelines into practice in  
563 resource-limited settings. *Translational Pediatrics*. 2021;10(10):2646-65.
- 564 24. Wiens MO, Kissoon N, Holsti L. Challenges in pediatric post-sepsis care in resource limited  
565 settings: a narrative review. *Transl Pediatr*. 2021;10(10):2666-77.
- 566 25. Gourabathini H, Bhalala U. Improving complex discharge process: It's all about parental  
567 education and empowerment. *Journal of Pediatric Critical Care*. 2022;9(5):155-6.
- 568 26. Gopal P, Fisher D, Seruwagi G, Taddese HB. Male involvement in reproductive, maternal,  
569 newborn, and child health: evaluating gaps between policy and practice in Uganda. *Reproductive*  
570 *Health*. 2020;17(1):114.
- 571 27. Nkurunziza T, Riviello R, Kateera F, Nihwacu E, Nkurunziza J, Gruendl M, et al. Enablers  
572 and barriers to post-discharge follow-up among women who have undergone a caesarean section:  
573 experiences from a prospective cohort in rural Rwanda. *BMC Health Services Research*.  
574 2022;22(1):733.
- 575 28. Christie SA, Mbianyor MA, Dissak-Delon FN, Tanjong MM, Chichom-Mefire A, Dicker  
576 RA, et al. Feasibility of a Cellular Telephone Follow-Up Program After Injury in Sub-Saharan  
577 Africa. *World Journal of Surgery*. 2020;44(8):2533-41.
- 578 29. Ajayi F. Mobile Communications, physical distance and access to follow-up healthcare  
579 service in Lagos Metropolis. *Bulletin of Geography*. 2018.
- 580 30. Louis Henry Kamulegeya JMB, Davis Musinguzi, Pauline Bakibinga. Continuity of health  
581 service delivery during the COVID-19 pandemic: the role of digital health technologies in  
582 Uganda. *The Pan African Medical Journal*. 2020;35(2).
- 583 31. Feroz A, Jabeen R, Saleem S. Using mobile phones to improve community health workers  
584 performance in low-and-middle-income countries. *BMC Public Health*. 2020;20(1):49.

585 32. Odendaal W, Lewin S, McKinstry B, Tomlinson M, Jordaan E, Mazinu M, et al. Using a  
586 mHealth system to recall and refer existing clients and refer community members with health  
587 concerns to primary healthcare facilities in South Africa: a feasibility study. *Global Health*  
588 *Action*. 2020;13(1):1717410.  
589
